# Supplementary material for: Perspectives of Nonphysician Clinical Students and Medical Lecturers on Tablet-Based Health Care Practice Support for Medical Education in Zambia, Africa: Qualitative Study
Source: JMIR Mhealth Uhealth. 2019 Jan 15;7(1):e12637. doi: 10.2196/12637 (PMC6350089; doi:10.2196/12637)
Supplement: Multimedia Appendix 1 [file mhealth_v7i1e12637_app1.pdf]

**Multimedia Appendix 1. Table of Bhuasiri et al.'s research framework with three main dimensions and sub-dimensions adapted to the setting of the medical licentiate program.**

| <b>Individual Dimension</b>                                 | <b>Term Definitions</b>                                                                                                                                                         |
|-------------------------------------------------------------|---------------------------------------------------------------------------------------------------------------------------------------------------------------------------------|
| <i>Learner's characteristics<br/>(students)</i>             |                                                                                                                                                                                 |
| - Attitude towards tablet-based e-platform                  | "Learners' impression of participating in [m-learning/mHealth] activities through [tablet] usage" [14]                                                                          |
| - Focus on interaction                                      | "The degree of contact and educational exchange among learners and between learners and instructors" [14] from the students' perspective                                        |
| <i>Instructor's characteristics<br/>(medical lecturers)</i> |                                                                                                                                                                                 |
| - Attitude towards tablet-based e-platform                  | Instructors' "impression of participating in [m-learning/mHealth] activities through [tablet] usage" [14]                                                                       |
| - Interaction fairness                                      | "The extent to which the learner feels having been treated fairly regarding his or her interaction with the instructor throughout the [m-learning/mHealth] process" [14]        |
| - Focus on interaction                                      | "The degree of contact and educational exchange [...] between learners and instructors" [14]                                                                                    |
| <i>Extrinsic motivation</i>                                 |                                                                                                                                                                                 |
| - Perceived usefulness                                      | "The degree to which a person believes that using [an m-learning/mHealth] system would enhance his or her learning performance" [14]                                            |
| - Technological flexibility                                 | The degree of flexibility that the technology is providing to users in a given setting                                                                                          |
| - Expandability                                             | The degree to which the provided m-learning and mHealth system and technology can be expanded according to user needs                                                           |
| - Saving resources                                          | The degree to which the provided m-learning and mHealth system and technology are saving users' resources as measured by monetary spending, time and additional characteristics |
| - Punishment/restriction                                    | The degree to which the provided m-learning and mHealth system and technology is restricting or punishing the user                                                              |
| <b>Environmental Dimension</b>                              |                                                                                                                                                                                 |
| - Interaction opportunities                                 | "Learner's perceived interactions with others" [14] through m-learning and mHealth                                                                                              |
| <b>System Dimension</b>                                     |                                                                                                                                                                                 |
| <i>Infrastructure and system</i>                            |                                                                                                                                                                                 |

|                                        |                                                                                                                                                                        |
|----------------------------------------|------------------------------------------------------------------------------------------------------------------------------------------------------------------------|
| <i>quality</i>                         |                                                                                                                                                                        |
| - Ease of use                          | “Refers to the degree to which the prospective user expects the use of [m-learning/mHealth] to be free of effort” [14]                                                 |
| - System functionality                 | “The perceived ability of [m-learning/mHealth] to provide flexible access to instructional and assessment media” [14]                                                  |
| - Technological adequacy               | Refers to the degree to which the user expects the provided device to fit the setting and area of use                                                                  |
| - Technological quality                | The quality of the provided device as measured by battery runtime, hardware reliability, operating system quality, and other characteristics                           |
| - Internet quality                     | “The quality of the internet that can be measured by transmission rate, error rates, and other characteristics” [14]                                                   |
| <i>Course and information quality</i>  |                                                                                                                                                                        |
| - Reliability                          | “Concerned with the degree of accuracy, dependability, and consistency of the information” [14]                                                                        |
| - Relevant content                     | “The degree of congruence between what the learner wants or requires and what is provided by the information, course content, and services” [14]                       |
| <i>Institution and service quality</i> |                                                                                                                                                                        |
| - Sustainability of the e-platform     | The degree to which m-learning and mHealth is implemented sustainably within the educational infrastructure                                                            |
| - Tablet and e-platform training       | “The amount of specialized instruction and practice that is afforded to the learner to increase the learner’s proficiency in utilizing [m-learning/mHealth][...]” [14] |
| - Service quality                      | The quality of the service provided for m-learning and mHealth and the provided device                                                                                 |
